# Supplementary material
Source: PubMed Central journal article supplement (PMC4702639)
Supplement: AEM.02608-15_zam999116796so1.pdf [file AEM.02608-15_zam999116796so1.pdf]

## Supplemental Material

**Supplementary Figure S1.** Three major bands recognized by scFv were severed from the SDS-PAGE gel (Fig. 6) for mass spectrometric analysis. (A-C) After alignment with SwissProt 2011 database, the matched amino acids of trypsin-digested fragments were shown in bold and the matched protein indicated that of zinc metalloproteinase-disintegrin acutolysin which is also called SVMP containing 609 amino acids. SVMP: snake venom metalloproteinase.

**(A)** Band m1 match peptide of **Zinc metalloproteinase-disintegrin acutolysin** (24%) shown in **Bold**

01 MIQVLLVTIC LAAPFYQGSS IILESGDVND YEVVYPRKVT ALPKGAVQQK  
51 YEDAMQYEFK VNGEPVVLHL EKNKHLFSKD YSETHYSPDG REITINPPVE  
101 DHCYYHGRIE NDGDSTASIS ACNGLKGNFK LQGETYLIEP MKLSDSEAHA  
151 VFKYENVEKD EAPKMGVQTQ KWKSYEPIKK ISQLNLIPEQ QIYDPFKYVE  
201 TVVVVDKAMV **TKYNGDLDKI** ITKMYEAANN **MNEMYRYMFF** RVVMVGLIHW  
251 TEEDKITVKP DVDYTLNAFA EWRKTYLLAE **KKHDNAQLIT** GIDFRGSIIG  
301 **YAYIGSMCHP** KRSVGIQDY SPINLVLAVI MAHEMGHNLG IHDDGYCYC  
351 GGYPCIMGPS ISPEPSKFFS NCSYIQCWDF IMNHNPECID NEPLGTDIIS  
401 PPLCGNELLE VGEECDGTP ENCQNECCDA ATCKLKS**GSQ** CGHGKCEQC  
451 **KFRTSGTECR** ASMSECDPAE HCTGQSSECP ADVFHKNGEP CLDNYGYCYN  
501 GNCPIMYHQC YALFGAEVYE AEDSCFESNK **KGNYGYCRK** ENGKKIPCAS  
551 EDVKCGRLYC **KDDSPGQNNP** CKMFYSNDDE **HKGMVLPGTK** CADGKVCNSG  
601 HCDVVTAY

**(B)** Band m2 match peptide of **Zinc metalloproteinase-disintegrin acutolysin** (37%) shown in **Bold**

01 MIQVLLVTIC LAAPFYQGSS IILESGDVND YEVVYPRKVT ALPKGAVQQK  
51 YEDAMQYEFK VNGEPVVLHL EKNKHLFSKD YSETHYSPDG REITINPPVE  
101 DHCYYHGRIE NDGDSTASIS ACNGLKGNFK LQGETYLIEP MKLSDSEAHA  
151 VFKYENVEKD EAPKMGVQTQ KWKSYEPIKK ISQLNLIPEQ QIYDPFKYVE  
201 TVVVVDKAMV **TKYNGDLDKI** ITKMYEAANN **MNEMYRYMFF** RVVMVGLIHW  
251 TEEDKITVKP DVDYTLNAFA EWRKTYLLAE **KKHDNAQLIT** GIDFRGSIIG  
301 **YAYIGSMCHP** KRSVGIQDY SPINLVLAVI MAHEMGHNLG IHDDGYCYC  
351 GGYPCIMGPS ISPEPSKFFS NCSYIQCWDF IMNHNPECID NEPLGTDIIS  
401 PPLCGNELLE VGEECDGTP ENCQNECCDA ATCKLKS**GSQ** CGHGKCEQC  
451 **KFRTSGTECR** **ASMSECDPAE** HCTGQSSECP ADVFHKNGEP CLDNYGYCYN  
501 GNCPIMYHQC YALFGAEVYE AEDSCFESNK **KGNYGYCRK** ENGKKIPCAS  
551 EDVKCGRLYC **KDDSPGQNNP** CKMFYSNDDE **HKGMVLPGTK** CADGKVCNSG  
601 HCDVVTAY

**(C)** Band m3 match peptide of **Zinc metalloproteinase-disintegrin acutolysin** (24%) shown in **Bold**

01 MIQVLLVTIC LAAPFYQGSS IILESGDVND YEVVYPRKVT ALPKGAVQQK  
51 YEDAMQYEFK VNGEPVVLHL EKNKHLFSKD YSETHYSPDG REITINPPVE  
101 DHCYYHGRIE NDGDSTASIS ACNGLKGNFK LQGETYLIEP MKLSDSEAHA  
151 VFKYENVEKD EAPKMGVQTQ KWKSYEPIKK ISQLNLIPEQ QIYDPFKYVE  
201 TVVVVDKAMV **TKYNGDLDKI** ITKMYEAANN **MNEMYRYMFF** RVVMVGLIHW  
251 TEEDKITVKP DVDYTLNAFA EWRKTYLLAE **KKHDNAQLIT** GIDFRGSIIG  
301 **YAYIGSMCHP** KRSVGIQDY SPINLVLAVI MAHEMGHNLG IHDDGYCYC  
351 GGYPCIMGPS ISPEPSKFFS NCSYIQCWDF IMNHNPECID NEPLGTDIIS  
401 PPLCGNELLE VGEECDGTP ENCQNECCDA ATCKLKS**GSQ** CGHGKCEQC  
451 **KFRTSGTECR** **ASMSECDPAE** HCTGQSSECP ADVFHKNGEP CLDNYGYCYN  
501 GNCPIMYHQC YALFGAEVYE AEDSCFESNK **KGNYGYCRK** ENGKKIPCAS  
551 EDVKCGRLYC **KDDSPGQNNP** CKMFYSNDDE **HKGMVLPGTK** CADGKVCNSG  
601 HCDVVTAY
